# Supplementary material for: Highly Dynamic Cellular-Level Response of Symbiotic Coral to a Sudden Increase in Environmental Nitrogen
Source: PubMed Central journal article supplement — mBio. 2013 May 14;4(3):e00052-13. doi: 10.1128/mBio.00052-13 (PMC3656441; doi:10.1128/mbio.00052-13), 2013-05-14
Supplement: mbo003131519st1.pdf [file mbo003131519st1.pdf]

| ROI number | Experiment                                                          | Description     | $\delta^{15}\text{N}$ (‰ mean $\pm$ sd) |
|------------|---------------------------------------------------------------------|-----------------|-----------------------------------------|
| 1          | $^{15}\text{N}$ -ammonium<br>(1h, 20 $\mu\text{M}$ ) under<br>light | dinoflagellate  | 3287 $\pm$ 15                           |
| 2          |                                                                     | dinoflagellate  | 2322 $\pm$ 18                           |
| 3          |                                                                     | oral gastroderm | 426 $\pm$ 14                            |
| 4          |                                                                     | oral gastroderm | 509 $\pm$ 15                            |
| 5          |                                                                     | calicodermis    | 210 $\pm$ 16                            |
| -          | control                                                             | dinoflagellate  | 2 $\pm$ 21 (3 $\sigma$ )                |
| -          | control                                                             | coral tissue    | 2 $\pm$ 40 (3 $\sigma$ )                |
