# Supplementary material for: Highly Dynamic Cellular-Level Response of Symbiotic Coral to a Sudden Increase in Environmental Nitrogen
Source: PubMed Central journal article supplement — mBio. 2013 May 14;4(3):e00052-13. doi: 10.1128/mBio.00052-13 (PMC3656441; doi:10.1128/mbio.00052-13), 2013-05-14
Supplement: mbo003131519st2.pdf [file mbo003131519st2.pdf]

| Sample                 | Tracer                    | Concentration<br>( $\mu\text{M}$ ) | Coral incubation<br>(h) | $\delta^{15}\text{N}$ (‰) of uric acid |
|------------------------|---------------------------|------------------------------------|-------------------------|----------------------------------------|
| Uric acid standard     | /                         | /                                  | /                       | 14                                     |
| Dinoflagellate extract | none                      | /                                  | /                       | -1                                     |
| Dinoflagellate extract | $^{15}\text{N}$ -ammonium | 2                                  | 6                       | 870                                    |
| Dinoflagellate extract | $^{15}\text{N}$ -ammonium | 20                                 | 1.5                     | 890                                    |
| Dinoflagellate extract | $^{15}\text{N}$ -nitrate  | 30                                 | 12                      | 9710                                   |
