# Supplementary material for: Highly Dynamic Cellular-Level Response of Symbiotic Coral to a Sudden Increase in Environmental Nitrogen
Source: PubMed Central journal article supplement — mBio. 2013 May 14;4(3):e00052-13. doi: 10.1128/mBio.00052-13 (PMC3656441; doi:10.1128/mbio.00052-13), 2013-05-14
Supplement: mbo003131519st3.pdf [file mbo003131519st3.pdf]

| Mean ( $\pm$ sd, n=3) $\delta^{15}\text{N}$ (‰) of dinoflagellates |                       |                              |
|--------------------------------------------------------------------|-----------------------|------------------------------|
| Time (h)                                                           | Light/dark experiment | Constant darkness experiment |
| 0                                                                  | 8 ( $\pm$ 1)          | 0 ( $\pm$ 10)                |
| 1                                                                  | 420 ( $\pm$ 30)       | 120 ( $\pm$ 30)              |
| 2                                                                  | 870 ( $\pm$ 270)      | 230 ( $\pm$ 30)              |
| 6                                                                  | 1580 ( $\pm$ 490)     | 350 ( $\pm$ 70)              |
| 12                                                                 | 1870 ( $\pm$ 450)     | 400 ( $\pm$ 80)              |
| 24                                                                 | 2360 ( $\pm$ 240)     | 390 ( $\pm$ 40)              |
| 48                                                                 | 2540 ( $\pm$ 90)      | 410 ( $\pm$ 20)              |
| 96                                                                 | 1820 ( $\pm$ 200)     | 490 ( $\pm$ 110)             |
