# Supplementary material for: Highly Dynamic Cellular-Level Response of Symbiotic Coral to a Sudden Increase in Environmental Nitrogen
Source: PubMed Central journal article supplement — mBio. 2013 May 14;4(3):e00052-13. doi: 10.1128/mBio.00052-13 (PMC3656441; doi:10.1128/mbio.00052-13), 2013-05-14
Supplement: mbo003131519st4.pdf [file mbo003131519st4.pdf]

| <i>Symbiodinium</i> species                            | GeneBank accession number / Gene ID | Annotation              | Species with closest similarity (GeneBank accession number) | Query coverage (%) | E value |
|--------------------------------------------------------|-------------------------------------|-------------------------|-------------------------------------------------------------|--------------------|---------|
| <i>Symbiodinium</i><br><i>clade C3</i>                 | ZooX023H11.g                        | Uricase                 | <i>Arabidopsis thaliana</i> (NP_180191.1)                   | 100                | 9e-29   |
|                                                        |                                     |                         | <i>Lotus japonicas</i> (BAB18538.1)                         | 100                | 1e-19   |
|                                                        |                                     |                         | <i>Vitis vinifera</i> (ABD03949.1)                          | 98                 | 2e-19   |
|                                                        |                                     |                         | <i>Glycine max</i> (BAA13185.1)                             | 100                | 1e-18   |
|                                                        |                                     |                         | <i>Ricinus communis</i> (XP_002516638.1)                    | 100                | 2e-18   |
| <i>Symbiodinium</i><br>sp. Mf1.05b<br><i>(clade B)</i> | mf105_rep_c30885                    | Xanthine deshydrogenase | <i>Arabidopsis lyrata</i> (XP_002874931.1)                  | 91                 | 8e-53   |
|                                                        |                                     |                         | <i>Oryza sativa Japonica</i> (ABF96752.1)                   | 92                 | 3e-52   |
|                                                        |                                     |                         | <i>Populus trichocarpa</i> (XP_002314067.1)                 | 91                 | 9e-52   |
|                                                        |                                     |                         | <i>Vitis vinifera</i> (XP_002285473.1)                      | 92                 | 4e-51   |
|                                                        |                                     |                         | <i>Taeniopygia guttata</i> (XP_002194980.1)                 | 90                 | 8e-51   |
